# Supplementary material for: Eating Behavior and Nutritional Status in Spanish Schoolchildren
Source: Preprints.org preprint supplement (doi:10.20944/preprints202210.0316.v1), 2022-10-21
Supplement: Supplementary file 1 [file supplementary]

**Table S1.** Anthropometric profile of the sample stratified by sexes and classified by nutritional condition by Body Mass Index (BMI), Waist to Height Ratio (WHtR), and Percent Body Fat (%BF)

|  | | | Boys (Mean ± SD) | | | | | | Girls (Mean ± SD) | | | |
| --- | --- | --- | --- | --- | --- | --- | --- | --- | --- | --- | --- | --- |
| Age (years) | | | 10.13 ± 2.41 | | | | | | 10.58±2.44 | | | |
| Weight (kg) | | | 43.98± 15.61 | | | | | | 42.21 ± 16.65 | | | |
| Height (cm) | | | 143.43± 15.51 | | | | | | 142,90 ± 13,38 | | | |
| Waist circumference (cm) | | | 70.40± 12.60 | | | | | | 67.30±10.25 | | | |
| BMI (kg/m2) | | | 19.71± 4.18 | | | | | | 20.14±4.79 | | | |
| WHtR | | | 0.48 ± 0.063 | | | | | | 0.46± 0.054 | | | |
| BMI1 | | | | | | | | | | | | |
|  | | Low weight  N (%) | | | Normal weight N (%) | | Overweight  N (%) | | | | | Obesity  N (%) |
| Boys | | 8 (4.20%) | | | 117 (61.60%) | | 43 (22.60%) | | | | | 22 (11.60%) |
| Girls | | 11 (11.80%) | | | 48 (51.60%) | | 25 (26.90%) | | | | | 9 (9.70%) |
| Total | | 19 (6.70%) | | | 165 (58.30%) | | 68 (24.00%) | | | | | 31 (11.00%) |
| WHtR2 | | | | | | | | | | | | |
|  | No abdominal obesity  N (%) | | | | | Abdominal overweight  N (%) | | | | Abdominal obesity  N (%) | | |
| Boys | 100 (52.60%) | | | | | 23 (12.10%) | | | | 67 (35.30%) | | |
| Girls | 51 (54.80%) | | | | | 19 (20.40%) | | | | 23 (24.70%) | | |
| Total | 151 (53.40%) | | | | | 42 (14.80%) | | | | 90 (31.80%) | | |
| %BF3 | | | | | | | | | | | | |
|  | Low (p<10)  N (%) | | | Medium (p-10-90) N (%) | | | | High (p90-97)  N (%) | | | Very high (p>97)  N (%) | |
| Boys | 5 (2.60%) | | | 76 (40.00%) | | | | 40 (21.10%) | | | 69 (36.30%) | |
| Girls | 10 (10.80%) | | | 47 (50.50%) | | | | 15 (16.10%) | | | 21 (22.60%) | |
| Total | 15 (5.30%) | | | 123 (43.50%) | | | | 55 (19.40%) | | | 90 (31.80%) | |

*BMI (Body Mass Index); WHtR (Waist to Heigth ratio); %BF (Body fat).*

*Excess weight:*

*1BMI of overweight or obesity according to the cut-off points of Cole et al. (Cole et al. 2000, 2007).*

*2Excess abdominal fat: WHR ≥ 0.47 in males and 0.48 in females (Marrodán et al. 2013). 3Excess adiposity: %BF >p90 according to the references of Marrodán et al. (Marrodán et al. 2006).*
